# Supplementary material
Source: MDPI journal article supplement (https://www.mdpi.com/2673-4591/4/1/35)

**ICMA  
2021**

# 1st International Conference on Micromachines and Applications

15–30 APRIL 2021 | ONLINE

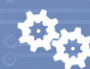

*micromachines*

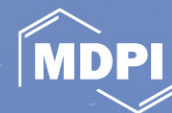

**Reinaldo R.Souza<sup>1,\*</sup>, Vera Faustino<sup>1,2</sup>, Inês M.Gonçalves<sup>1,3</sup>, João M.Miranda<sup>4</sup>, Ana S.Moita<sup>3,5</sup>, A.L.N. Moreira<sup>3</sup>, Manuel Bañobre-López<sup>2</sup> and Rui Lima<sup>1,4</sup>**

<sup>1</sup> Metrics, Mechanical Engineering Department, University of Minho, Campus de Azurém, 4800-058, Guimarães, Portugal;

<sup>2</sup> International Iberian Nanotechnology Laboratory, Braga 4715-330, Portugal;

<sup>3</sup> IN+, Center for Innovation, Technology and Policy Research, Instituto Superior Técnico, Universidade de Lisboa. Av. Rovisco Pais, 1049-001 Lisboa, Portugal;

<sup>4</sup> CEFT, Transport Phenomena Research Center, Porto University Engineering Faculty (FEUP), R. Dr. Roberto Frias, 4200-465 Porto, Portugal;

<sup>5</sup> CINAMIL, Military Academy Research Center, Portuguese Military Academy, R. Gomes Freire, 203, 1169-203 Lisbon, Portugal

\* Corresponding author: [d8999@dem.uminho.pt](mailto:d8999@dem.uminho.pt)

## Experimental studies of the sedimentation, stability and thermal conductivity of two different nanofluids

$\text{Al}_2\text{O}_3$  nanofluid  
Versus  
 $\text{Fe}_3\text{O}_4@\text{PAA}$  nanofluid

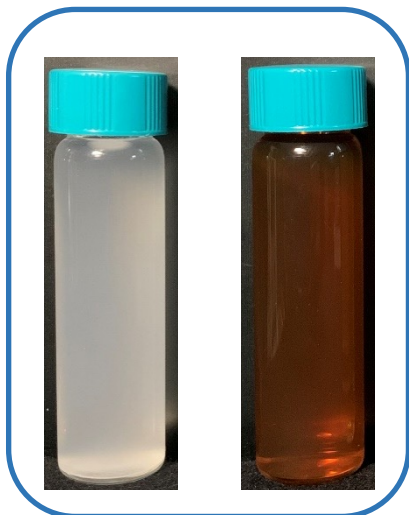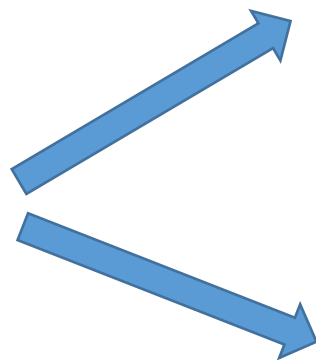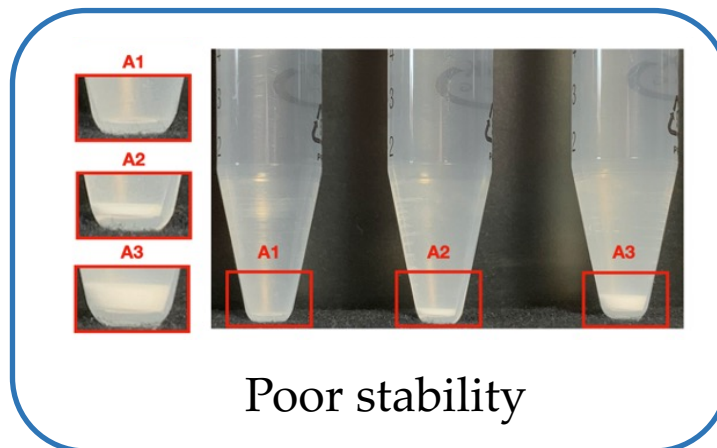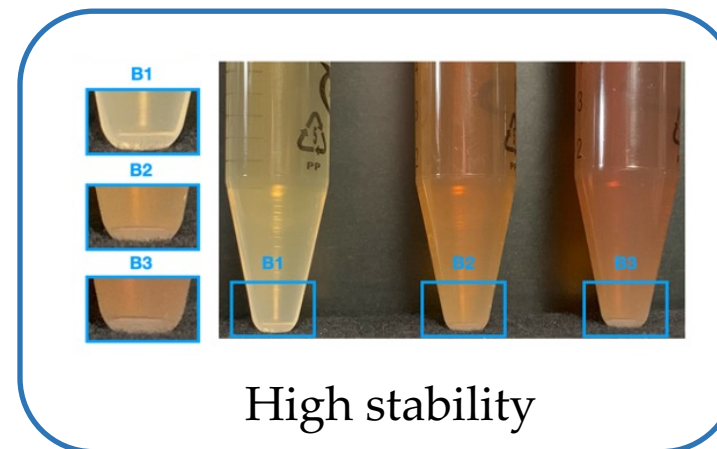

## Abstract

Fluids containing nanometer-sized particles (nanofluids, NFs), are potential candidates to improve the performance and efficiency of several thermal devices at micro and macro scale levels. However, the problem of sedimentation and instability of these colloidal dispersions, has been the biggest obstacle for industrial scale applications. In this work, two different NFs were tested using distilled water (DI-Water) as the base fluid. The first is a traditional NF formed by  $\text{Al}_2\text{O}_3$  nanoparticles (NPs) and the second is a novel NF formed by poly (acrylic acid)-coated iron oxide NPs ( $\text{Fe}_3\text{O}_4@\text{PAA}$ ), obtained through a hydrothermal synthesis process. The main objective of this study was to evaluate the colloidal stability of these NFs over time using different volume fractions and compare it with DI-Water. Results involving sedimentation studies and zeta potential measurements showed that the proposed  $\text{Fe}_3\text{O}_4@\text{PAA}$  NF presents a higher colloidal stability compared to that of the  $\text{Al}_2\text{O}_3$  NF. Additionally, thermal conductivity measurements were performed in both  $\text{Fe}_3\text{O}_4@\text{PAA}$  and  $\text{Al}_2\text{O}_3$  NFs at different NP concentrations, using the transient plane source technique. Results showed higher thermal conductivity values for the  $\text{Fe}_3\text{O}_4@\text{PAA}$  NFs compared to those of  $\text{Al}_2\text{O}_3$  NFs. However, a linear enhancement of thermal conductivity with increasing NPs concentration was observed for the  $\text{Al}_2\text{O}_3$  NF over the whole range of NP concentrations tested, whereas two different regimes were observed for the  $\text{Fe}_3\text{O}_4@\text{PAA}$  NF.

**Keywords:** Nanofluids; zeta potential; stability; thermal conductivity.

## Introduction

- Nanofluids (NFs) has been frequently used to augment the heat transfer capacity of a fluid by studying their thermophysical properties and stability.
- The NFs are being used in different fields of engineering, ranging from nanomedicine to renewable energies (Gonçalves et *al.* 2021).

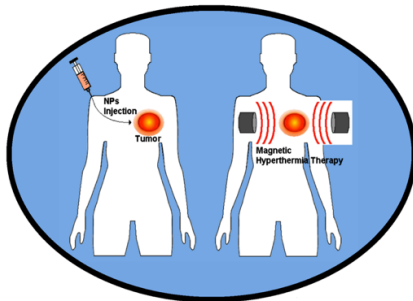

**Medicine**

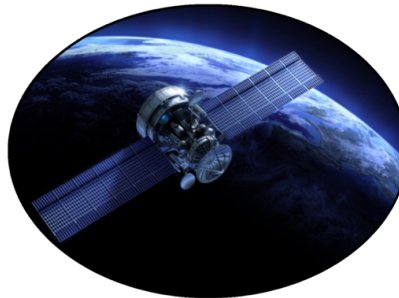

**Space**

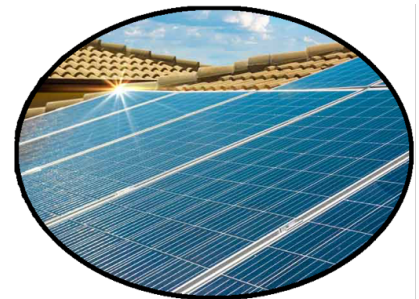

**Solar energy**

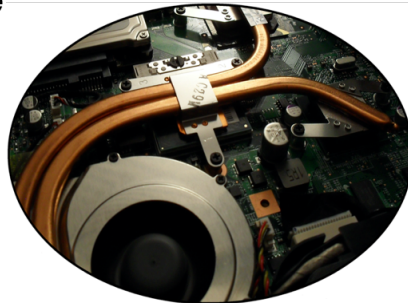

**Heat pipes**

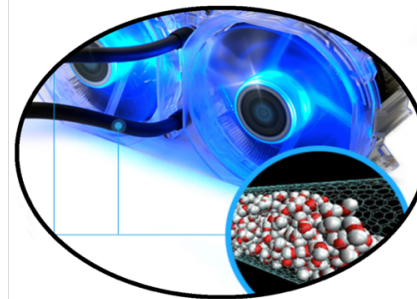

**CPU Cooler**

## Materials and methods

### *Nanoparticles characteristics*

Table 1. Physical properties of the nanoparticles.

|                             | $\text{Al}_2\text{O}_3$ | $\text{Fe}_3\text{O}_4$            |
|-----------------------------|-------------------------|------------------------------------|
| Physical property           | Commercial              | Synthesized by hydrothermal method |
| Size (nm)                   | <50                     | $5.0 \pm 1.1$                      |
| color                       | white                   | dark brown                         |
| $\rho$ (kg/m <sup>3</sup> ) | 3900                    | 5170                               |
| $c_p$ (J/kgK)               | 779                     | 670                                |
| k (W/mK)                    | 36                      | 6                                  |

### *Nanofluids preparation*

- The samples of  $\text{Al}_2\text{O}_3$  were prepared by means of the two-step method, Haddad et al. (2014);
- The samples of  $\text{Fe}_3\text{O}_4$ @PAA were obtained through a hydrothermal synthesis process described by Kolen'ko et al. (2014).

## Materials and methods

### *Nanofluids concentrations evaluated*

Table 2. Nanoparticles concentrations

| Concentrations [w/v %]                    |                                                  |
|-------------------------------------------|--------------------------------------------------|
| Alumina (Al <sub>2</sub> O <sub>3</sub> ) | Iron oxide (Fe <sub>3</sub> O <sub>4</sub> @PAA) |
| -                                         | 0.001                                            |
| -                                         | 0.005                                            |
| 0.01                                      | 0.01                                             |
| -                                         | 0.03                                             |
| 0.05                                      | 0.05                                             |
| 0.1                                       | 0.1                                              |

### *Meaning of Zeta Potential*

Table 3. Stability behavior of the colloid mixture based on zeta potential value ( Kumar et al. 2017)

| Zeta Potential [mV]  | Stability behavior                |
|----------------------|-----------------------------------|
| 0 to $\pm 5$         | Rapid coagulation or flocculation |
| $\pm 10$ to $\pm 30$ | Incipient instability             |
| $\pm 30$ to $\pm 40$ | Moderate stability                |
| $\pm 40$ to $\pm 60$ | Good stability                    |
| > 61                 | Excellent stability               |

## Materials and methods

### *Measurements of the thermal conductivity and zeta potential*

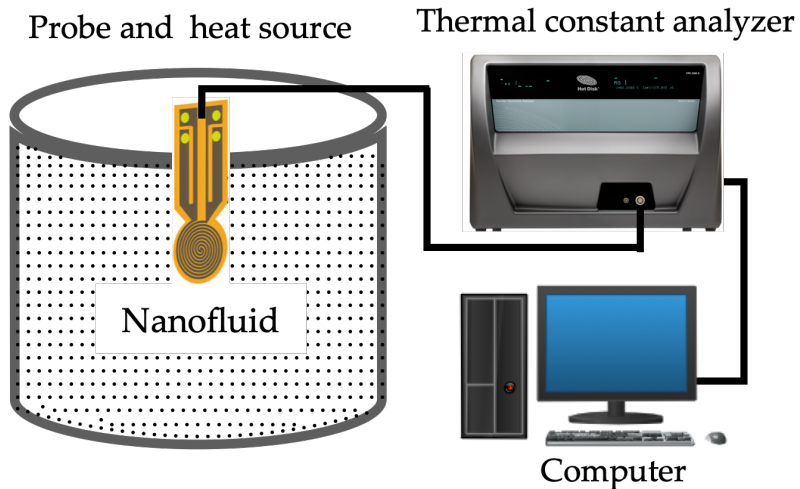

The thermal conductivity of NFs were measured using a TPS 2500S thermal constants analyzer (Hot Disk®).

**Fig.1. Transient plane source method**

The zeta potential were measured by Zetasizer DLS

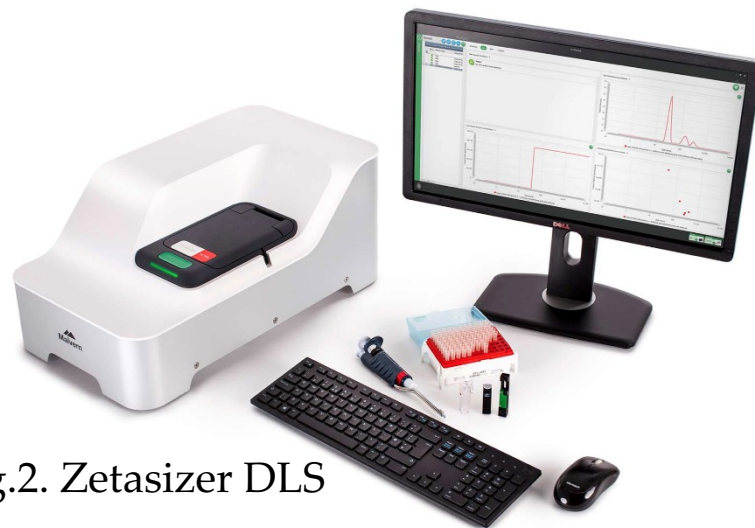

**Fig.2. Zetasizer DLS**

## Results and Discussion

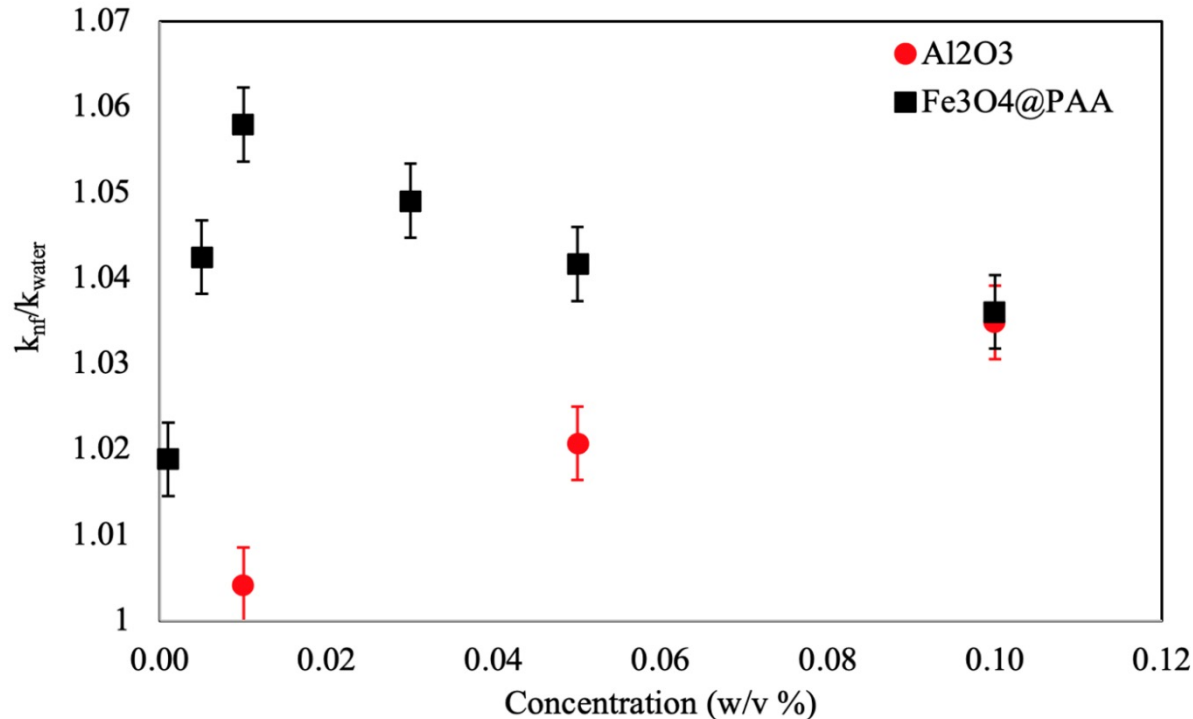

Fig.3. Comparison between the ratio the thermal conductivity of the  $Al_2O_3$  and  $Fe_3O_4@PAA$  NFs and the thermal conductivity from DI-Water at 22 °C in function of the nanoparticles concentration.

- The main advantage of the proposed  $Fe_3O_4@PAA$  NFs is that it has a high thermal conductivity using a smaller amount of NPs when compared to the traditional  $Al_2O_3$  NFs.

# Results and Discussion

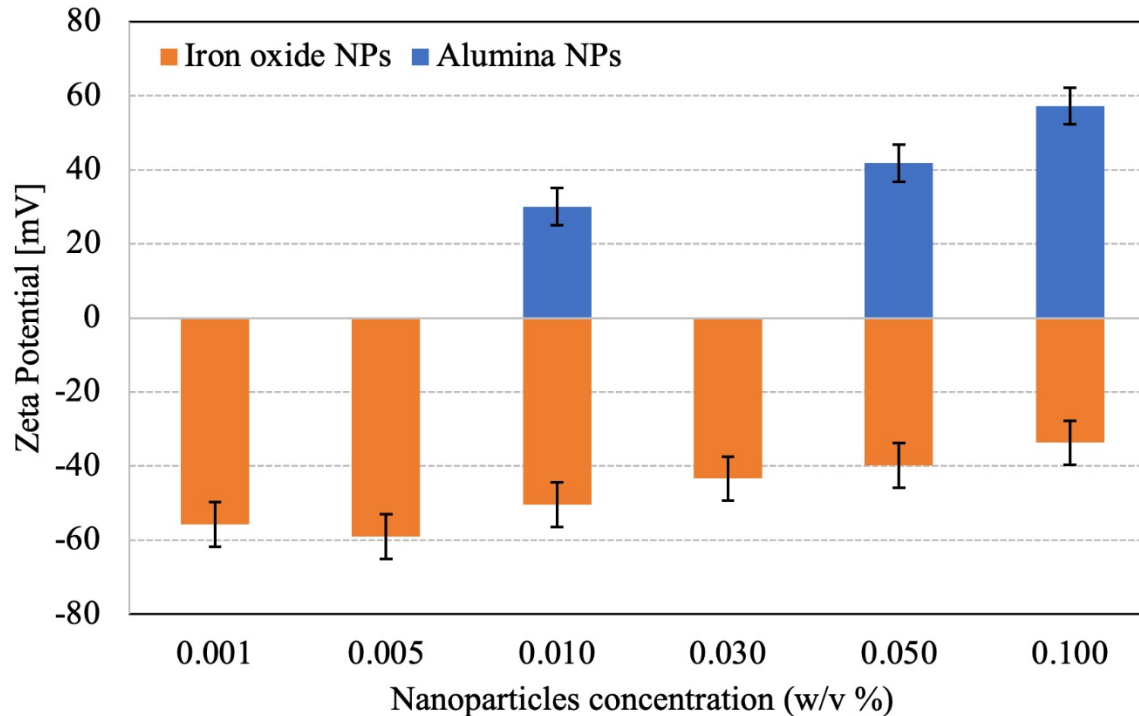

Fig.4. Zeta potential as function of nanoparticles concentration.

- Comparing Fig.4 with Table.3 the results indicating that all iron oxides NPs present zeta potential values into the range of  $\pm 40$  to  $\pm 60$  which means a good stability.
- Although, the results for alumina NPs show stability behavior between moderate and good, unlike the iron oxide NFs, the NFs had to be submitted to an ultrasonic bath of 2 consecutive hours before the beginning of the measurements.

# Results and Discussion

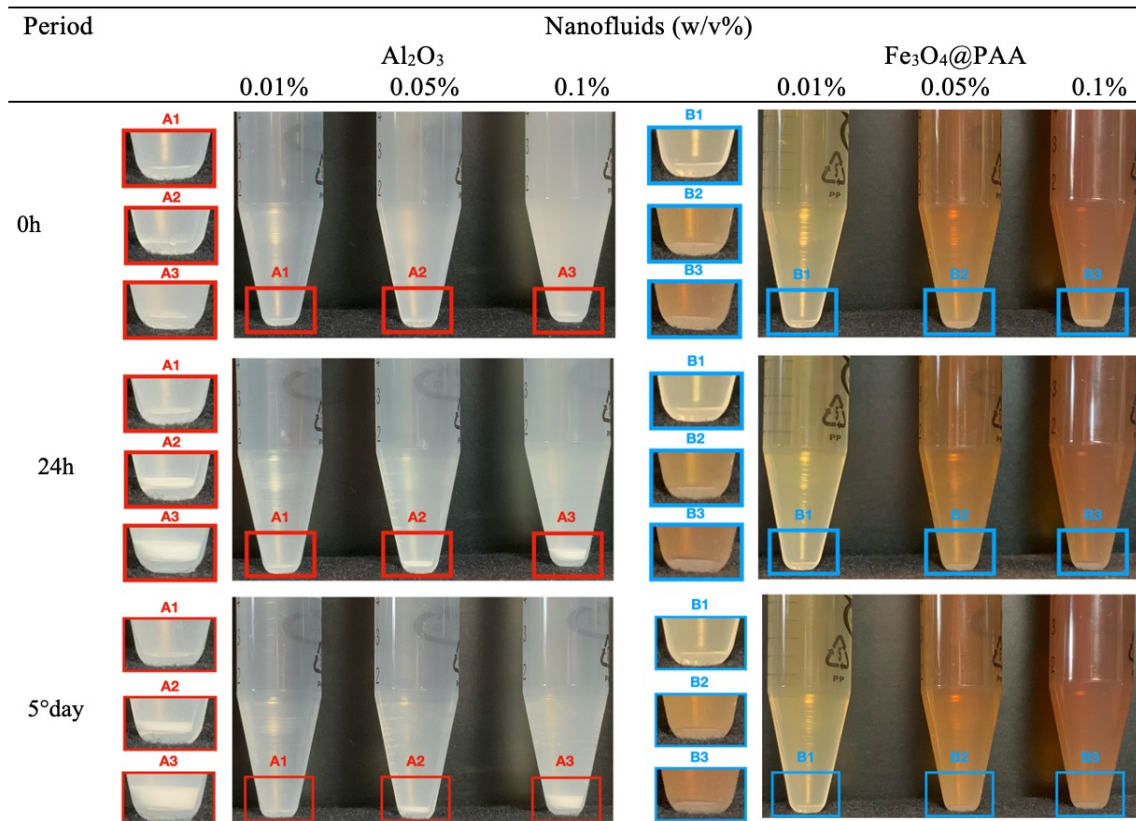

Fig.5. Qualitative analysis of NFs in function of time after preparation for three different concentrations. At left are  $\text{Al}_2\text{O}_3$  NFs and at right are the  $\text{Fe}_3\text{O}_4@\text{PAA}$  NFs.

- For these results, it is possible to conclude that the proposed  $\text{Fe}_3\text{O}_4@\text{PAA}$  NF is more much colloidal and stable than the  $\text{Al}_2\text{O}_3$  NF.

# Conclusions

- The synthesis process used to produce these nanoparticles allowed to develop a NF with an extremely high stability and free of sedimentation, when compared with commercial  $\text{Al}_2\text{O}_3$  NFs;
- The thermal conductivity ratio increases with the increase of NPs concentration for all the tested NFs;
- The thermal conductivity of  $\text{Fe}_3\text{O}_4$ @PAA/water NF has shown a limit maximum of grow with concentration, reaching the maximum value at 0.01 w/v%, after that, a reduction in the thermal conductivity was observed. Similar behavior was obtained by other studies when surfactants were added to the NFs;
- The magnitude of the zeta potential indicated the good stability for all  $\text{Fe}_3\text{O}_4$ @PAA NF and better values was obtained for low concentrations of nanoparticles;
- The zeta potential for  $\text{Al}_2\text{O}_3$  NF also presented good stability, however, the measured values were obtained immediately after 2 hours in an ultrasonic bath, after that, it is not possible guarantee the stability of the mixture.

# References

Gonçalves, I.; Souza, R.; Coutinho, G.; Miranda, J.; Moita, A.; Pereira, J.E.; Moreira, A.; Lima, R. Thermal Conductivity of Nanofluids: A Review on Prediction Models, Controversies and Challenges. *Appl. Sci.* 2021, 11, 2525. <https://doi.org/10.3390/app11062525>

Z. Haddad, C. Abid, H.F. Oztop, A. Mataoui, A review on how the researchers prepare their nanofluids, *Int. J. Therm. Sci.* 76 (2014) 168–189. doi:<https://doi.org/10.1016/j.ijthermalsci.2013.08.010>.

Y. V Kolen'ko, M. Bañobre-López, C. Rodríguez-Abreu, E. Carbó-Argibay, A. Sailsman, Y. Piñeiro-Redondo, M.F. Cerqueira, D.Y. Petrovykh, K. Kovnir, O.I. Lebedev, J. Rivas, Large-Scale Synthesis of Colloidal  $\text{Fe}_3\text{O}_4$  Nanoparticles Exhibiting High Heating Efficiency in Magnetic Hyperthermia, *J. Phys. Chem. C.* 118 (2014) 8691–8701. doi:10.1021/jp500816u.

A. Kumar, C.K. Dixit, 3 - Methods for characterization of nanoparticles, in: S. Nimesh, R. Chandra, N.B.T.-A. in N. for the D. of T.N.A. Gupta (Eds.), Woodhead Publishing, 2017: pp. 43–58. doi:<https://doi.org/10.1016/B978-0-08-100557-6.00003-1>.

# Acknowledgments

This work has been funded by Portuguese national funds of FCT/MCTES (PIDDAC) through the base funding from the following research units: UIDB/00532/2020 (Transport Phenomena Research Center – CEFT), UIDB/04077/2020 (MEtRICs) and UIDP/04436/2020. The authors are also grateful for the funding of FCT through the projects LISBOA-01-0145-FEDER-030171/NORTE-01-0145-FEDER-030171 (PTDC/EME-SIS/30171/2017) and NORTE-01-0145-FEDER-029394 (PTDC/EMD-EMD/29394/2017), funded by COMPETE2020, NORTE2020, PORTUGAL2020 and FEDER. The authors are also very grateful to Professor Luís Mesquita and Mr. David Bento (IPB) for their support and technical assistance provided to this research work.

## FUNDING & SPONSORS

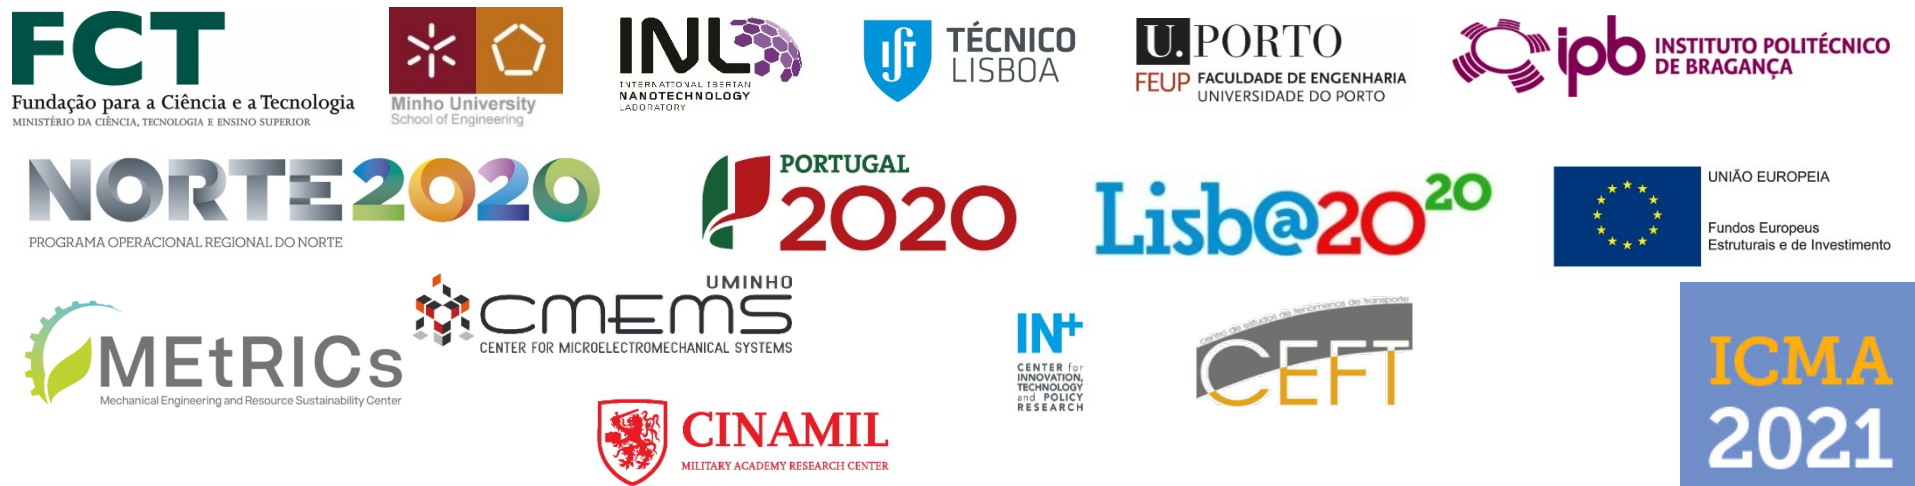

Supplement: s1 [file s1]
